# Supplementary material
Source: publisher site journal article supplement (https://www.dovepress.com/article/620050)
Supplement: Supplementary file 1 [file 620050%20Revised%20%2509Supplementary_File.docx]

**Supplementary File 1. Database-Specific Search Strategies**

*Barriers and Facilitators to Electronic Health Record Documentation Compliance in Multidisciplinary Hospital Settings: A Scoping Review*

**Search details.** The revised search was conducted from database inception to 13 April 2026, with no date restriction. Searches were limited to English-language publications. Records from PubMed, ScienceDirect, and selected databases accessed through the EBSCOhost platform were exported to Mendeley for deduplication before screening.

**EBSCOhost platform note.** EBSCOhost is a search platform rather than a single database. The databases searched through EBSCOhost were eBook Collection (EBSCOhost), Literary Reference Source, and Middle Eastern & Central Asian Studies.

**Search fields.** Where supported by each database, terms were searched across title, abstract, keyword, subject heading, MeSH terms, full text, or broader searchable fields. The search strategy was adapted to the indexing structure and technical requirements of each database.

| **Database / source** | **Databases or search fields** | **Final search string** | **Limits and date** | **Records identified** |
| --- | --- | --- | --- | --- |
| **PubMed** | MeSH and title/abstract fields. | (("Electronic Health Records"[Mesh] OR "electronic health record*"[tiab] OR EHR[tiab] OR EMR[tiab] OR "electronic medical record*"[tiab]) AND (documentation[tiab] OR "clinical documentation"[tiab] OR "record keeping"[tiab] OR "medical record documentation"[tiab]) AND (complian*[tiab] OR adheren*[tiab] OR completeness[tiab] OR timeliness[tiab] OR "documentation quality"[tiab] OR "documentation practice*"[tiab]) AND (barrier*[tiab] OR facilitator*[tiab] OR challenge*[tiab] OR implementation[tiab] OR usability[tiab] OR workflow[tiab]) AND (multidisciplinary[tiab] OR interprofessional[tiab] OR interdisciplinary[tiab] OR "healthcare professional*"[tiab] OR clinician*[tiab] OR nurse*[tiab] OR physician*[tiab]) AND (hospital*[tiab] OR "acute care"[tiab] OR inpatient*[tiab])) | No date restriction; English language; final search date: 13 April 2026. | 154 |
| **EBSCOhost platform** | Databases: eBook Collection (EBSCOhost), Literary Reference Source, and Middle Eastern & Central Asian Studies. Search field: TX / all text. | TX ("electronic health record*" OR "electronic medical record*" OR EHR OR EMR) AND TX ("clinical documentation" OR documentation OR "electronic documentation" OR "medical record*" OR "record keeping") AND TX (complian* OR adheren* OR completeness OR timeliness OR "documentation quality" OR "documentation practice*" OR "documentation burden") AND TX (barrier* OR facilitator* OR challenge* OR implementation OR usability OR workflow) AND TX (multidisciplinary OR interprofessional OR interdisciplinary OR "healthcare professional*" OR clinician* OR nurse* OR physician* OR pharmacist* OR "allied health") AND TX (hospital* OR inpatient* OR "acute care" OR ward* OR ICU OR "intensive care" OR "emergency department") | No date restriction; English language; final search date: 13 April 2026. | 172 |
| **ScienceDirect** | Title, abstract, keywords, and other available searchable fields supported by the platform. Syntax was simplified where needed to comply with ScienceDirect Boolean connector limits. | ("electronic health record" OR "electronic medical record" OR EHR OR EMR) AND ("clinical documentation" OR "documentation compliance" OR "documentation adherence" OR "documentation completeness" OR "documentation quality" OR "documentation burden") AND (multidisciplinary OR interprofessional OR interdisciplinary OR "healthcare professionals" OR clinicians OR nurses OR physicians OR pharmacists OR "allied health") AND ("acute care" OR inpatient OR hospital OR "emergency department" OR ICU OR "intensive care") AND (barrier OR barriers OR facilitator OR facilitators OR implementation OR usability OR workflow) | No date restriction; English language; final search date: 13 April 2026. | 282 |

**Screening summary.** A total of 608 records were identified. After removal of 8 duplicate records, 600 records were screened by title and abstract. During title and abstract screening, 498 records were excluded. A total of 102 reports were sought for retrieval and assessed for eligibility. No reports were unavailable. Of the 102 full-text reports assessed, 80 were excluded, and 22 studies were included in the review.

| **Stage** | **Number** |
| --- | --- |
| Records identified | 608 |
| Duplicate records removed before screening | 8 |
| Records screened | 600 |
| Records excluded at title/abstract screening | 498 |
| Reports sought for retrieval | 102 |
| Reports not retrieved | 0 |
| Reports assessed for eligibility | 102 |
| Full-text reports excluded | 80 |
| **Studies included in review** | 22 |

**Reasons for full-text exclusion.** Not conducted in an eligible acute or hospital-based clinical setting (n = 21); did not address EHR/EMR documentation compliance, documentation quality, completeness, timeliness, or related barriers/facilitators (n = 24); not primary empirical research, including reviews, commentaries, protocols, or editorials (n = 13); wrong population or not aligned with eligible clinical users or multidisciplinary hospital workflows (n = 12); insufficient focus on documentation-related outcomes or implementation factors (n = 7); language or full-text accessibility constraints (n = 3).

**Abbreviations.** EHR, electronic health record; EMR, electronic medical record; ICU, intensive care unit; MeSH, Medical Subject Headings; PCC, Population-Concept-Context.
